# Supplementary material for: Diagnostic Values of Red Flags and a Clinical Prediction Score for Emergent Intracranial Lesions in Non-Traumatic Pediatric Headaches
Source: MDPI journal article supplement (doi:10.3390/children9060863), 2022-06-10
Supplement: s1 [file s1]

Supporting information Table S1 Emergent and non-emergent intracranial lesions:

| Emergent                                                                                                                                               | Non-emergent                                                    |
|--------------------------------------------------------------------------------------------------------------------------------------------------------|-----------------------------------------------------------------|
| Brain tumors                                                                                                                                           | White matter abnormalities associated with migraines            |
| Meningitis (i.e. viral or bacterial)                                                                                                                   | Pineal cyst                                                     |
| Encephalitis (i.e. infective or autoimmune associated)                                                                                                 | Calcified granuloma                                             |
| Idiopathic intracranial hypertension                                                                                                                   | Choroid plexus xanthogranuloma                                  |
| Intracranial hemorrhage (i.e. SAH, SDH, EDH or intraparenchymal hemorrhage)                                                                            | Developmental venous anomaly                                    |
| Reversible cerebral vasoconstriction syndrome (RCVS)                                                                                                   | Mild sinusitis                                                  |
| Posterior reversible encephalopathy syndrome (PRES)                                                                                                    | Cavum septi pellucidi, cavum vergae or cavum velum interpositum |
| Cerebral venous sinus thrombosis                                                                                                                       |                                                                 |
| Shunt malfunction                                                                                                                                      |                                                                 |
| Ischemic stroke                                                                                                                                        |                                                                 |
| Hydrocephalus                                                                                                                                          |                                                                 |
| Multiple sclerosis (MS)                                                                                                                                |                                                                 |
| Major congenital malformation/ anomaly (i.e. Dandy-Walker malformation, Chiari malformation, Sturge-Weber syndrome & PHACES)                           |                                                                 |
| Cystic brain lesion with mass effect or hydrocephalus (i.e. colloid cyst with hydrocephalus or arachnoid cyst with mass effect to cerebral hemisphere) |                                                                 |
| Cavernous malformation (particularly bleeding lesion)                                                                                                  |                                                                 |
| Invasive fungal sinusitis with intracranial extension                                                                                                  |                                                                 |

Supporting information Table S2 The Final Diagnosis of the Pediatric Patients with Non-Traumatic Headaches (N=109)

| Diagnosis                                            | Frequency | Percentage |
|------------------------------------------------------|-----------|------------|
| Emergent lesion                                      |           |            |
| Brain tumor                                          | 13        | 11.93%     |
| Intracranial infection                               | 13        | 11.93%     |
| Intracranial hemorrhage                              | 7         | 6.42%      |
| Reversible cerebral vasoconstriction syndrome (RVCS) | 3         | 2.75%      |
| Posterior reversible encephalopathy syndrome (PRES)  | 3         | 2.75%      |
| Cerebral venous sinus thrombosis                     | 3         | 2.75%      |
| Shunt malfunction                                    | 3         | 2.75%      |
| Stroke                                               | 2         | 1.83%      |
| Arachnoid cyst with complication                     | 2         | 1.83%      |
| Idiopathic increased intracranial pressure           | 2         | 1.83%      |
| Intraventricular cyst with hydrocephalus             | 2         | 1.83%      |
| Hydrocephalus                                        | 1         | 0.92%      |
| Autoimmune encephalitis                              | 1         | 0.92%      |
| Multiple sclerosis                                   | 1         | 0.92%      |
| Ataxia telangiectasia                                | 1         | 0.92%      |
| Cerebral involvement of ALL                          | 1         | 0.92%      |
| Non emergent intracranial lesion                     |           |            |
| Headache disorders                                   | 26        | 23.85%     |
| ● Migraine                                           | 20        | 18.35%     |

|                                                                             |    |        |
|-----------------------------------------------------------------------------|----|--------|
| ● Tension-type headache                                                     | 6  | 5.50%  |
| Inconclusive diagnosis                                                      | 14 | 12.84% |
| Others; such as dengue fever, epilepsy, chronic sinusitis, and hypertension | 11 | 10.09% |

Supporting information Table S3. Breakdown of top three emergent intracranial lesion

Brain tumor (total 13)

|                                                         |   |
|---------------------------------------------------------|---|
| Mature teratoma of the pineal gland                     | 1 |
| Pituitary macroadenoma                                  | 2 |
| Ependymoma                                              | 1 |
| Medulloblastoma                                         | 3 |
| Diffuse astrocytoma of the brain stem                   | 1 |
| Non-germinomatous germ cell tumor of the pineal gland   | 1 |
| Glioblastoma                                            | 2 |
| Germinoma of the pineal gland                           | 1 |
| CNS involvement of the acute lymphocytic leukemia (ALL) | 1 |

Infection (total 13)

|                            |   |
|----------------------------|---|
| HIV encephalopathy         | 1 |
| Cryptococcal meningitis    | 1 |
| Neurocysticercosis         | 2 |
| Japanese encephalitis (JE) | 2 |
| Cerebral toxoplasmosis     | 1 |
| Pyogenic brain abscess     | 3 |
| Bacterial meningitis       | 2 |
| Dengue encephalitis        | 1 |

Hemorrhage (total 7)

|                                          |   |
|------------------------------------------|---|
| Bleeding from arteriovenous malformation | 3 |
| Bleeding from cavernoma                  | 1 |
| Bleeding from ruptured aneurysm          | 1 |
| Unknown cause                            | 2 |

Supporting information Table S4 Association between red flags and emergent intracranial lesions

| Red-flags (n, col %)                                                | Total<br>(N=109) | Emergent intracranial lesion |                           |         |
|---------------------------------------------------------------------|------------------|------------------------------|---------------------------|---------|
|                                                                     |                  | Negative lesions<br>(n=58)   | Positive lesion<br>(n=51) | p-value |
| Acute onset (<3 months)                                             | 72 (66.1)        | 30 (51.7)                    | 42 (82.4)                 | <0.01   |
| Severe vomiting                                                     | 65 (59.6)        | 31 (53.5)                    | 34 (66.7)                 | 0.16    |
| High-risk underlying comorbidities                                  | 26 (23.8)        | 11 (19.0)                    | 15 (29.4)                 | 0.20    |
| Fever                                                               | 21 (19.3)        | 8 (13.8)                     | 13 (25.5)                 | 0.12    |
| Focal motor abnormality                                             | 20 (18.4)        | 3 (5.2)                      | 17 (33.3)                 | <0.01   |
| Changes in mood or personality over days or weeks                   | 20 (18.4)        | 5 (8.6)                      | 15 (29.4)                 | <0.01   |
| Altered conscious state                                             | 19 (17.4)        | 4 (6.9)                      | 15 (29.4)                 | <0.01   |
| Seizures                                                            | 16 (14.7)        | 5 (8.6)                      | 11 (21.6)                 | 0.06    |
| Abnormal ocular movements, squint, pathological pupillary responses | 16 (14.7)        | 2 (3.5)                      | 14 (27.5)                 | <0.01   |
| Increase in severity or characteristics of the headache             | 14 (12.8)        | 5 (8.6)                      | 9 (17.7)                  | 0.16    |
| Pain that wakes the child from sleep or occurs on waking            | 13 (11.9)        | 8 (13.8)                     | 5 (9.8)                   | 0.52    |

|                                                                                 |           |          |           |       |
|---------------------------------------------------------------------------------|-----------|----------|-----------|-------|
| Ataxia, gait abnormalities, impaired coordination                               | 13 (11.9) | 1 (1.7)  | 12 (23.4) | <0.01 |
| Meningism                                                                       | 12 (11.0) | 3 (3.5)  | 10 (19.6) | <0.01 |
| Occipital headache                                                              | 11 (10.1) | 8 (13.8) | 3 (5.9)   | 0.17  |
| Visual field defects                                                            | 10 (9.2)  | 3 (5.2)  | 7 (13.7)  | 0.12  |
| Cranial nerve palsies                                                           | 8 (7.3)   | 2 (3.5)  | 6 (11.8)  | 0.14  |
| Papilledema                                                                     | 7 (6.4)   | 2 (3.5)  | 5 (9.8)   | 0.18  |
| Age < 5 years                                                                   | 6 (5.5)   | 2 (3.5)  | 4 (7.8)   | 0.32  |
| Poor general condition                                                          | 5 (4.6)   | 0 (0)    | 5 (9.8)   | 0.02  |
| Sudden onset of headache (first or worst ever)                                  | 5 (4.6)   | 1 (1.7)  | 4 (7.8)   | 0.18  |
| Worsening of pain with cough or Valsalva maneuver                               | 3 (2.8)   | 5 (5.2)  | 0 (0)     | 0.25  |
| Increased head circumference                                                    | 1 (0.9)   | 1 (1.7)  | 0 (0)     | 1.00  |
| Change of the character of headache in patients diagnosed with primary headache | 0 (0)     | 0 (0)    | 0 (0)     | --    |

Supporting information Table S5. Discrimination and diagnostic value for each red flag

| Red flags                                                           | Sensitivity (%) | Specificity (%) | Correctly Classified | Positive Likelihood Ratio | AuROC (95% CI)      |
|---------------------------------------------------------------------|-----------------|-----------------|----------------------|---------------------------|---------------------|
| Acute onset (<3 months)                                             | 82.4            | 48.3            | 64.2                 | 1.59                      | 0.65 (0.56 to 0.74) |
| Severe vomiting                                                     | 66.7            | 46.6            | 56.0                 | 1.25                      | 0.56 (0.47 to 0.66) |
| High-risk underlying comorbidities                                  | 29.4            | 81.0            | 56.9                 | 1.55                      | 0.55 (0.47 to 0.63) |
| Fever                                                               | 25.5            | 86.2            | 57.8                 | 1.85                      | 0.56 (0.48 to 0.63) |
| Focal motor abnormality                                             | 33.3            | 94.8            | 66.1                 | 6.44                      | 0.64 (0.56 to 0.71) |
| Changes in mood or personality over days or weeks                   | 29.4            | 91.4            | 62.4                 | 3.41                      | 0.60 (0.53 to 0.68) |
| Altered conscious state                                             | 29.4            | 93.1            | 63.3                 | 4.26                      | 0.61 (0.54 to 0.68) |
| Seizures                                                            | 21.6            | 91.4            | 58.7                 | 2.50                      | 0.56 (0.49 to 0.63) |
| Abnormal ocular movements, squint, pathological pupillary responses | 27.5            | 96.6            | 64.2                 | 7.96                      | 0.62 (0.55 to 0.68) |
| Increase in severity or characteristics of the headache             | 17.7            | 91.4            | 56.9                 | 2.04                      | 0.54 (0.48 to 0.61) |
| Pain that wakes the child from sleep or occurs on waking            | 9.8             | 86.2            | 50.5                 | 0.71                      | 0.48 (0.41 to 0.54) |
| Ataxia, gait abnormalities, impaired coordination                   | 23.5            | 98.3            | 63.3                 | 13.6                      | 0.60 (0.54 to 0.67) |

|                                                                                          |      |       |      |      |                     |
|------------------------------------------------------------------------------------------|------|-------|------|------|---------------------|
| Meningism                                                                                | 19.6 | 96.6  | 60.5 | 5.69 | 0.58 (0.52 to 0.64) |
| Occipital headache                                                                       | 5.9  | 86.2  | 48.6 | 0.43 | 0.46 (0.41 to 0.52) |
| Visual field defects                                                                     | 13.7 | 94.8  | 56.9 | 2.65 | 0.54 (0.49 to 0.60) |
| Cranial nerve palsies                                                                    | 11.8 | 96.6  | 56.9 | 3.41 | 0.54 (0.49 to 0.59) |
| Papilledema                                                                              | 9.8  | 96.6  | 56.0 | 2.84 | 0.53 (0.48 to 0.58) |
| Age < 5 years                                                                            | 7.8  | 96.6  | 55.1 | 2.27 | 0.52 (0.48 to 0.57) |
| Poor general condition                                                                   | 9.8  | 100.0 | 57.8 | -    | 0.55 (0.51 to 0.59) |
| Sudden onset of headache<br>(first or worst ever)                                        | 7.8  | 98.3  | 56.0 | 4.55 | 0.53 (0.49 to 0.57) |
| Worsening of pain with cough<br>or Valsalva maneuver                                     | 0    | 94.8  | 55.5 | 0    | 0.47 (0.44 to 0.50) |
| Increased head<br>circumference                                                          | 0    | 98.3  | 52.3 | 0    | 0.49 (0.47 to 0.51) |
| Change of the character of<br>headache in patients<br>diagnosed with primary<br>headache | -    | -     | -    | -    | -                   |
